# Supplementary material
Source: publisher site journal article supplement (https://www.degruyterbrill.com/publication/isbn/9783110292879/downloadAsset/9783110292879_Inhaltsverzeichnis.pdf)
Supplement: Supplementary file 1 [file 9783110292879_Inhaltsverzeichnis.pdf]

# Inhaltsverzeichnis

|                                                                                                                 |    |
|-----------------------------------------------------------------------------------------------------------------|----|
| Einführung . . . . .                                                                                            | I  |
| Der Fall Wagner – neu aufgerollt . . . . .                                                                      | 1  |
| Forschungsstand und Methode . . . . .                                                                           | 3  |
| Zur Terminologie . . . . .                                                                                      | 13 |
| Das Unbewusste/ Subjektivität . . . . .                                                                         | 13 |
| Anthropologie . . . . .                                                                                         | 14 |
| Die Romantik/ die Romantiker . . . . .                                                                          | 15 |
| Oper/ Musikdrama/ Musiktheater . . . . .                                                                        | 15 |
| Aufbau der Studie . . . . .                                                                                     | 16 |
| 1 Das Unbewusste als Grund und Abgrund: Was bedeutet »romantische Subjektivität? . . . . .                      | 18 |
| 1.1. Das Sein vor dem Bewusstsein: Zur Konzeption des Unbewussten in der frühromantischen Philosophie . . . . . | 21 |
| 1.2. Die Theorie der Bewusstwerdung in Schellings Naturphilosophie . . . . .                                    | 27 |
| 1.3. Das Unbewusste in der romantischen Anthropologie (Kluge, Schubert) . . . . .                               | 35 |
| 1.4. Das Unbewusste im romantischen Kunstwerk . . . . .                                                         | 45 |
| 2 »Erwacht, sich selber erkennt kaum«: Die prekäre Entstehung des Bewusstseins . . . . .                        | 49 |
| 2.1. Das Erwachen ins Bewusstsein und seine naturphilosophischen Grundlagen . . . . .                           | 50 |
| 2.1.1. Das <i>Rheingold</i> -Vorspiel oder: Das Unbewusste erwacht . . . . .                                    | 50 |
| 2.1.2. »Ein Wort! Ein einzig Wort!« – Die Entstehung der Sprache . . . . .                                      | 60 |
| 2.2. Die Verwirrung des erwachten Subjekts . . . . .                                                            | 64 |
| 2.2.1. Wotans und Elsas Erwachen . . . . .                                                                      | 65 |
| 2.2.2. Erwachensszenen bei Kleist und Hoffmann . . . . .                                                        | 69 |
| 2.3. Die Erweckung des Unbewussten . . . . .                                                                    | 77 |
| 3 Die Verheißung der Vergangenheit: Wagners mythisches Zeitbewusstsein . . . . .                                | 85 |
| 3.1. Das triadische Modell des Mythos . . . . .                                                                 | 88 |
| 3.1.1. Wagners dramaturgischer Dreischritt . . . . .                                                            | 88 |
| 3.1.2. Die Idee des Goldenen Zeitalters in der Romantik . . . . .                                               | 96 |

|        |                                                                                                                                       |     |
|--------|---------------------------------------------------------------------------------------------------------------------------------------|-----|
| 3.2.   | Die Zürcher Kunstschriften und die Dialektik<br>der ›Neuen Mythologie‹ . . . . .                                                      | 103 |
| 3.2.1. | Elemente romantischer Mythologie in den Kunstschriften . .                                                                            | 103 |
| 3.2.2. | Phantasie als Synthese . . . . .                                                                                                      | 108 |
| 3.2.3. | Zur Bewusstwerdung des Unbewussten in den<br>Kunstschriften . . . . .                                                                 | 124 |
| 3.3.   | Mythos und romantisches Zeitempfinden. . . . .                                                                                        | 129 |
| 3.3.1. | Die Ahnung der Erinnerung: Romantische Mythomotorik . .                                                                               | 129 |
| 3.3.2. | Die Psychologie des ›Einst‹ in Wagners Musikdramen . . . . .                                                                          | 137 |
| 3.4.   | Muttersegen letzter Gruß: Kindheit, Trauma, Sexualität . . . . .                                                                      | 142 |
| 3.4.1. | Das Goldene Zeitalter der Kindheit und seine<br>Schattenseiten . . . . .                                                              | 142 |
| 3.4.2. | Sehrende Sehnsucht: Traumatische Urszenen von<br><i>Lohengrin</i> bis <i>Parsifal</i> . . . . .                                       | 150 |
| 4      | »Laß mich ihn sehn wie ich ihn sah«: Ästhetik und Anthropologie<br>des Blicks . . . . .                                               | 156 |
| 4.1.   | »Ein neues höheres Auge«: Zum Motiv der Hellsichtigkeit . . . . .                                                                     | 158 |
| 4.1.1. | Hellsichtigkeit und ihre Folgen für die Sinneshierarchie<br>in der Musikästhetik Wagners, Schopenhauers<br>und der Romantik . . . . . | 158 |
| 4.1.2. | Zur Potenzierung des Blicks in der romantischen<br>Anthropologie . . . . .                                                            | 172 |
| 4.1.3. | Das höhere Sehen in Wagners Musikdramen. . . . .                                                                                      | 179 |
| 4.2.   | Die Sprache(n) des stummen Blicks . . . . .                                                                                           | 190 |
| 4.2.1. | Das Wechselspiel von Blick, Gestik und Musik . . . . .                                                                                | 190 |
| 4.2.2. | Zur Konkurrenz von Intuition und Diskursivität<br>in der Romantik. . . . .                                                            | 196 |
| 4.3.   | Bilder und ihre Geschichten . . . . .                                                                                                 | 201 |
| 4.3.1. | Flucht vor dem Wort ins Bild: <i>Der fliegende Holländer</i> . . . . .                                                                | 201 |
| 4.3.2. | Die Versprachlichung des Blicks bei Schelling, Carus<br>und Hoffmann. . . . .                                                         | 205 |
| 4.3.3. | Die Deutung der Bilder: Vom <i>Lohengrin</i> zur <i>Traumnovelle</i> . .                                                              | 214 |
| 4.4.   | Geheimnisse des Wieder-Sehens: Zum Motiv des Déjà-vu . . . . .                                                                        | 226 |
| 4.4.1. | Urbild und Abbild: Die romantische Konzeption<br>der Anamnese . . . . .                                                               | 226 |
| 4.4.2. | Traumbild und Trauma: Das Déjà-vu bei<br>Richard Wagner. . . . .                                                                      | 234 |
| 5      | Geschichte des Ich: Zum Zusammenhang von Identität<br>und Erzählung . . . . .                                                         | 255 |
| 5.1.   | <i>Der fliegende Holländer</i> : Musikdrama als Identitätsdrama . . . . .                                                             | 260 |
| 5.2.   | Dynamische Subjektivität: Schelling, Schubert, Carus. . . . .                                                                         | 269 |

|        |                                                                                                                                                            |     |
|--------|------------------------------------------------------------------------------------------------------------------------------------------------------------|-----|
| 5.3.   | Fallgeschichte und Anamnese: Lektüren des Ich<br>in der romantischen Literatur . . . . .                                                                   | 282 |
| 5.4.   | »Siegmund heiß' ich«: Namensgebung und Anamnese<br>bei Wagner . . . . .                                                                                    | 297 |
| 5.4.1. | Selbstvergewisserung: Warum bei Wagner so viel<br>erzählt wird . . . . .                                                                                   | 297 |
| 5.4.2. | Die Entstehung männlicher Identität durch Narration<br>in den Musikdramen <i>Die Walküre</i> , <i>Parsifal</i> und <i>Tristan<br/>und Isolde</i> . . . . . | 302 |
| 5.5.   | Individualität und Dynamik in <i>Oper und Drama</i> . . . . .                                                                                              | 315 |
| 5.6.   | <i>Der Ring des Nibelungen</i> als Familienroman . . . . .                                                                                                 | 324 |
| 5.6.1. | Zum Gegensatz von Glauben und Wissen im <i>Lohengrin</i> . . . .                                                                                           | 324 |
| 5.6.2. | Vom Unbewussten zum Unterbewussten:<br>Zur Topologie des <i>Rings</i> . . . . .                                                                            | 326 |
| 5.6.3. | Die Rekonstruktion der Geschichte: Siegfried<br>und Brünnhilde . . . . .                                                                                   | 329 |
| 5.6.4. | Das Subjekt und seine Familie: Wagners <i>Ring</i><br>und die erzählende Prosa der Moderne . . . . .                                                       | 338 |
| 6      | Die Ekstase der Erinnerung: Plötzlichkeit, Wahnsinn, Gedächtnis . . . .                                                                                    | 342 |
| 6.1.   | Tristans Taumel: Wahnsinn als Gedächtnisstörung . . . . .                                                                                                  | 344 |
| 6.2.   | Wahnsinn und Gedächtnis in der Romantik . . . . .                                                                                                          | 356 |
| 6.2.1. | Die Darstellung des Wahnsinns in Platons <i>Phaidros</i><br>und Cervantes' <i>Don Quixote</i> . . . . .                                                    | 356 |
| 6.2.2. | Das Gedächtnisproblem im Magnetismus . . . . .                                                                                                             | 360 |
| 6.2.3. | Plötzlichkeit und Wahnsinn bei Kleist und Hoffmann . . . .                                                                                                 | 364 |
| 6.3.   | Plötzlichkeit vs. Erzählung . . . . .                                                                                                                      | 372 |
| 6.4.   | Die Heilung des Wahnsinns in <i>Die Meistersinger von Nürnberg</i> . . .                                                                                   | 385 |
| 6.4.1. | »All mein Erinnern ist mir schnell geschwunden«:<br><i>Tannhäuser</i> . . . . .                                                                            | 385 |
| 6.4.2. | Deuten und Merken: Die <i>Meistersinger</i> . . . . .                                                                                                      | 390 |
|        | Ausblick und Schluss . . . . .                                                                                                                             | 407 |
|        | Literaturverzeichnis . . . . .                                                                                                                             | 409 |
|        | Siglen . . . . .                                                                                                                                           | 409 |
|        | Weitere Quellen . . . . .                                                                                                                                  | 410 |
|        | Forschungsliteratur . . . . .                                                                                                                              | 412 |
|        | Abbildungsnachweise . . . . .                                                                                                                              | 426 |
|        | Danksagung . . . . .                                                                                                                                       | 427 |
|        | Personenregister . . . . .                                                                                                                                 | 429 |
